# Supplementary material
Source: publisher site journal article supplement (https://www.dovepress.com/article/322696)
Supplement: Supplementary file 1 [file get_supplementary_file.php]

**Supplementary Material**

**Supplementary Table 1.** Physical performance at baseline and follow up and changes by malnutrition risk status among participants in disability-free SLAS-2 cohort

**Supplementary Figure 1**. Percentage frequencies of prevalent disability (2a), incident disability (2b) and functional decline (2c) by malnutrition risk status and presence of specific nutritional indicators.

**Supplementary Figure 2.** Adjusted means of Knee extension strength (1a), gait velocity (1b) and Timed Up-and-Go (1c) at baseline and follow-up by malnutrition risk status among disability-free SLAS2 participants.

Footnote: Estimated mean values adjusted for age, sex, ethnicity, education, housing type, marital status, living alone, hours of moderate-high physical activity and number of comorbidities.

Error bars are 95% confidence interval.

| **Supplementary Table 1.** Physical performance at baseline and follow up and changes by malnutrition risk status among participants in disability-free SLAS-2 cohort | | | | | | | | | | | | | | | | | | |
| --- | --- | --- | --- | --- | --- | --- | --- | --- | --- | --- | --- | --- | --- | --- | --- | --- | --- | --- |
|  |  | **Unadjusted Mean (SD)** | | | | | | |  | **Adjusted Mean (95%CI)** | | | | |  |  |  | **Group** |
|  |  | **N** | **Baseline** | |  | **N** | **Follow-up** | |  | **Baseline** | |  | **Follow-up** | |  | **Group** | **Time** | **Time** |
|  |  |  |  |  |  |  |  |  |  |  |  |  |  |  |  |  |  |  |
| **KES, kg** |  |  |  |  |  |  |  |  |  |  |  |  |  |  |  |  |  |  |
| Malnutrition risk score | 0 | 960 | 17.9 | ± 6.6 |  | 505 | 15.5 | ± 5.5 |  | 17.9 | (17.3, 18.5) |  | 15.4 | (14.8, 16.0) |  | 0.088 | 0.001 | 0.315 |
|  | 1-2 | 1056 | 17.1 | ± 6.6 |  | 526 | 15.2 | ± 5.2 |  | 17.5 | (17.0, 18.0) |  | 15.3 | (14.8, 15.9) |  |  |  |  |
|  | 3+ | 397 | 16.6 | ± 6.1 |  | 170 | 15.1 | ± 5.8 |  | 16.9 | (16.2, 17.6) |  | 15.2 | (14.3, 16.0) |  |  |  |  |
| Eating difficulty | No | 2443 | 17.3 | ± 6.6 |  | 1200 | 15.3 | ± 5.5 |  | 17.5 | (17.1, 17.9) |  | 15.2 | (14.7, 15.7) |  | 0.093 | 0.001 | 0.130 |
|  | Yes | 165 | 15.7 | ± 5.6 |  | 72 | 14.9 | ± 5.3 |  | 16.3 | (15.4, 17.3) |  | 15.1 | (14.0, 16.3) |  |  |  |  |
| Taking 5 or more drugs | No | 2158 | 17.4 | ± 6.5 |  | 1087 | 15.4 | ± 5.5 |  | 17.5 | (17.0, 18.0) |  | 15.3 | (14.8, 15.8) |  | 0.439 | 0.001 | 0.661 |
|  | Yes | 454 | 16.2 | ± 6.6 |  | 188 | 14.5 | ± 4.9 |  | 17.2 | (16.5, 17.9) |  | 15.2 | (14.3, 16.0) |  |  |  |  |
| Few fruits or vegetables | No | 2369 | 17.2 | ± 6.5 |  | 1170 | 15.2 | ± 5.3 |  | 17.5 | (17.0, 17.9) |  | 15.2 | (14.7, 15.7) |  | 0.866 | 0.001 | 0.071 |
|  | Yes | 239 | 17.1 | ± 6.4 |  | 102 | 16.2 | ± 6.7 |  | 17.0 | (16.2, 17.8) |  | 15.8 | (14.8, 16.8) |  |  |  |  |
| Low cholesterol | No | 2075 | 17.3 | ±6.5 |  | 1036 | 15.3 | ± 5.3 |  | 17.6 | (17.2, 18.1) |  | 15.4 | (14.9, 15.9) |  | 0.055 | 0.001 | 0.984 |
|  | Yes | 336 | 17.5 | ± 7.0 |  | 164 | 15.6 | ± 5.8 |  | 17.2 | (16.4, 17.8) |  | 14.9 | (14.0, 15.7) |  |  |  |  |
| Low albumin | No | 1943 | 17.5 | ± 6.6 |  | 988 | 15.4 | ± 5.4 |  | 17.6 | (17.1, 18.1) |  | 15.3 | (14.8, 15.8) |  | 0.308 | 0.001 | 0.593 |
|  | Yes | 493 | 16.7 | ± 6.4 |  | 224 | 14.9 | ± 5.5 |  | 17.2 | (16.6, 17.9) |  | 15.2 | (14.5, 15.9) |  |  |  |  |
| Low haemoglobin | No | 1932 | 17.6 | ± 6.7 |  | 990 | 15.5 | ± 5.6 |  | 17.7 | (17.2, 18.1) |  | 15.4 | (14.8, 15.9) |  | **0.038** | 0.001 | 0.571 |
|  | Yes | 477 | 16.1 | ± 6.0 |  | 209 | 14.3 | ± 4.4 |  | 17.1 | (16.4, 17.7) |  | 15.0 | (14.2, 15.8) |  |  |  |  |
| Low lymphocyte count | No | 2250 | 17.4 | ± 6.6 |  | 1123 | 15.4 | ± 5.5 |  | 17.6 | (17.1, 18.0) |  | 15.3 | (14.7, 15.8) |  | 0.697 | 0.001 | 0.349 |
|  | Yes | 163 | 16.6 | ± 5.8 |  | 78 | 14.7 | ± 4.4 |  | 17.1 | (16.1, 18.1) |  | 15.4 | (14.3, 16.6) |  |  |  |  |
| **GV, m/s** |  |  |  |  |  |  |  |  |  |  |  |  |  |  |  |  |  |  |
| Malnutrition risk score | 0 | 1002 | 1.31 | ± 0.36 |  | 510 | 1.24 | ± 0.31 |  | 1.28 | (1.24, 1.31) |  | 1.20 | (1.17, 1.24) |  | 0.170 | <0.001 | **0.002** |
|  | 1-2 | 1078 | 1.31 | ± 0.37 |  | 531 | 1.20 | ± 0.30 |  | 1.29 | (1.26, 1.32) |  | 1.17 | (1.13, 1.21) |  |  |  |  |
|  | 3+ | 421 | 1.28 | ± 0.34 |  | 173 | 1.12 | ± 0.31 |  | 1.30 | (1.26, 1.34) |  | 1.11 | (1.06, 1.16) |  |  |  |  |
| Eating difficulty | No | 2574 | 1.30 | ± 0.36 |  | 1208 | 1.20 | ± 0.31 |  | 1.29 | (1.26, 1.32) |  | 1.18 | (1.15,1.21) |  | 0.516 | 0.001 | 0.102 |
|  | Yes | 186 | 1.29 | ± 0.37 |  | 76 | 1.13 | ± 0.33 |  | 1.32 | (1.25, 1.37) |  | 1.13 | (1.06, 1.20) |  |  |  |  |
| Taking 5 or more drugs | No | 2276 | 1.30 | ± 0.36 |  | 1099 | 1.22 | ± 0.31 |  | 1.28 | (1.25, 1.31) |  | 1.19 | (1.15, 1.22) |  | 0.251 | 0.001 | **0.001** |
|  | Yes | 488 | 1.29 | ± 0.37 |  | 188 | 1.09 | ± 0.30 |  | 1.33 | (1.29, 1.37) |  | 1.10 | (1.04, 1.15) |  |  |  |  |
| Few fruits or vegetables | No | 2497 | 1.31 | ± 036 |  | 1182 | 1.20 | ± 0.31 |  | 1.29 | (1.26, 1.32) |  | 1.18 | (1.15, 1.21) |  | 0.059 | 0.001 | 0.462 |
|  | Yes | 263 | 1.27 | ± 0.37 |  | 102 | 1.14 | ± 0.27 |  | 1.27 | (1.22, 1.32) |  | 1.13 | (1.06, 1.19) |  |  |  |  |
| Low cholesterol | No | 2160 | 1.31 | ± 0.36 |  | 1046 | 1.22 | ± 0.31 |  | 1.28 | (1.25, 1.32) |  | 1.19 | (1.15, 1.22) |  | 0.100 | 0.001 | **0.015** |
|  | Yes | 337 | 1.28 | ± 0.35 |  | 165 | 1.13 | ± 0.31 |  | 1.30 | (1.25, 1.34) |  | 1.12 | (1.07, 1.17) |  |  |  |  |
| Low albumin | No | 2010 | 1.31 | ± 0.36 |  | 998 | 1.22 | ± 0.31 |  | 1.29 | (1.25, 1.32) |  | 1.19 | (1.15, 1.22) |  | **0.044** | 0.001 | **0.046** |
|  | Yes | 515 | 1.28 | ± 0.34 |  | 227 | 1.15 | ± 0.30 |  | 1.28 | (1.24, 1.33) |  | 1.13 | (1.08, 1.18) |  |  |  |  |
| Low haemoglobin | No | 1992 | 1.31 | ± 0.36 |  | 1000 | 1.21 | ± 0.31 |  | 1.28 | (1.25, 1.31) |  | 1.18 | (1.15, 1.21) |  | 0.700 | 0.001 | 0.255 |
|  | Yes | 504 | 1.29 | ± 0.36 |  | 212 | 1.17 | ± 0.32 |  | 1.29 | (1.25, 1.33) |  | 1.16 | (1.11, 1.21) |  |  |  |  |
| Low lymphocyte count | No | 2330 | 1.30 | ± 0.0 |  | 1131 | 1.21 | ± 0.31 |  | 1.29 | (1.26, 1.32) |  | 1.18 | (1.14, 1.21) |  | 0.206 | 0.001 | 0.848 |
|  | Yes | 171 | 1.27 | ± 0.0 |  | 83 | 1.16 | ± 0.28 |  | 1.25 | (1.19, 1.32) |  | 1.15 | (1.08, 1.22) |  |  |  |  |
| **TUG, sec** |  |  |  |  |  |  |  |  |  |  |  |  |  |  |  |  |  |  |
| Malnutrition risk score | 0 | 1006 | 7.9 | ± 2.1 |  | 511 | 8.5 | ±2.0 |  | 8.6 | (8.3, 8.8) |  | 9.3 | (9.0, 9.6) |  | **0.001** | <0.001 | 0.301 |
|  | 1-2 | 1101 | 8.7 | ± 3.2 |  | 535 | 9.1 | ± 3.2 |  | 8.9 | (8.7, 9.2) |  | 9.7 | (9.3, 10.0) |  |  |  |  |
|  | 3+ | 419 | 9.4 | ± 3.9 |  | 173 | 10.2 | ± 4.4 |  | 9.0 | (8.7, 9.4) |  | 10.2 | (9.7, 10.7) |  |  |  |  |
| Eating difficulty | No | 2553 | 8.6 | ± 3.2 |  | 1214 | 9.0 | ± 3.0 |  | 9.1 | (8.8, 9.3) |  | 9.8 | (9.5, 10.1) |  | 0.229 | 0.001 | 0.433 |
|  | Yes | 179 | 9.3 | ± 4.9 |  | 76 | 9.9 | ± 4.4 |  | 9.1 | (8.6, 9.6) |  | 10.2 | (9.5, 10.9) |  |  |  |  |
| Taking 5 or more drugs | No | 2261 | 8.3 | ± 3.0 |  | 1104 | 8.8 | ± 2.7 |  | 9.0 | (8.7, 9.2) |  | 9.6 | (9.4, 10.0) |  | **0.001** | 0.001 | 0.207 |
|  | Yes | 475 | 9.9 | ± 4.3 |  | 189 | 10.6 | ± 4.6 |  | 9.4 | (9.1, 9.8) |  | 10.5 | (10.0, 11.0) |  |  |  |  |
| Few fruits or vegetables | No | 2476 | 8.6 | ± 3.4 |  | 1187 | 9.0 | ± 3.1 |  | 9.1 | (8.9, 9.3) |  | 9.9 | (9.6, 10.1) |  | 0.158 | 0.001 | 0.699 |
|  | Yes | 256 | 8.7 | ± 2.7 |  | 103 | 9.2 | ± 2.7 |  | 8.8 | (8.3, 9.2) |  | 9.7 | (9.1, 10.3) |  |  |  |  |
| Low cholesterol | No | 2179 | 8.3 | ± 2.7 |  | 1051 | 8.8 | ± 2.8 |  | 8.8 | (8.5, 9.0) |  | 9.5 | (9.2, 9.8) |  | **0.001** | 0.001 | 0.399 |
|  | Yes | 346 | 9.4 | ± 4.3 |  | 165 | 10.0 | ± 4.3 |  | 9.1 | (8.8, 9.5) |  | 10.1 | (9.6, 10.6) |  |  |  |  |
| Low albumin | No | 2031 | 8.4 | ± 3.0 |  | 1002 | 8.8 | ± 2.8 |  | 8.8 | (8.6, 9.0) |  | 9.9 | (9.2, 9.8) |  | **0.001** | 0.001 | **0.019** |
|  | Yes | 518 | 8.9 | ± 3.1 |  | 228 | 9.8 | ± 3.8 |  | 8.9 | (8.6, 9.2) |  | 10.2 | (9.8, 10.6) |  |  |  |  |
| Low haemoglobin | No | 2002 | 8.3 | ± 2.8 |  | 1005 | 8.9 | ± 2.9 |  | 8.7 | (8.5, 9.0) |  | 9.6 | (9.3, 9.8) |  | **0.030** | 0.001 | 0.668 |
|  | Yes | 500 | 9.2 | ± 3.8 |  | 212 | 9.4 | ± 3.7 |  | 9.1 | (8.8, 9.4) |  | 9.8 | (9.3, 10.2) |  |  |  |  |
| Low lymphocyte count | No | 2352 | 8.5 | ± 3.1 |  | 1136 | 9.0 | ± 3.0 |  | 8.8 | (8.6, 9.1) |  | 9.6 | (9.3, 9.9) |  | 0.931 | 0.001 | 0.152 |
|  | Yes | 174 | 8.6 | ± 2.5 |  | 83 | 9.4 | ± 3.1 |  | 8.5 | (8.1, 9.0) |  | 9.9 | (9.2, 10.5) |  |  |  |  |
|  |  |  |  |  |  |  |  |  |  |  |  |  |  |  |  |  |  |  |
| Statistically significant associations are bold highlighted. | | | | | | | | | | | | | | | | | | |

**Supplementary Figure 1**


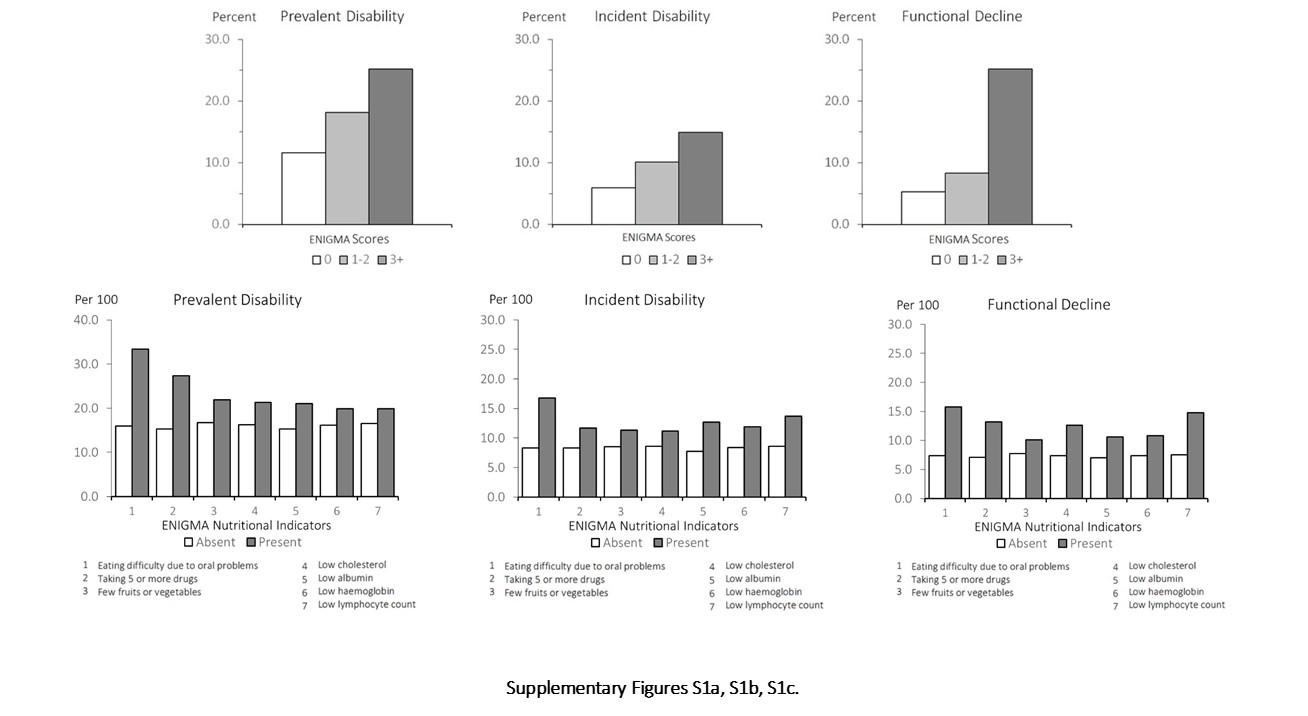


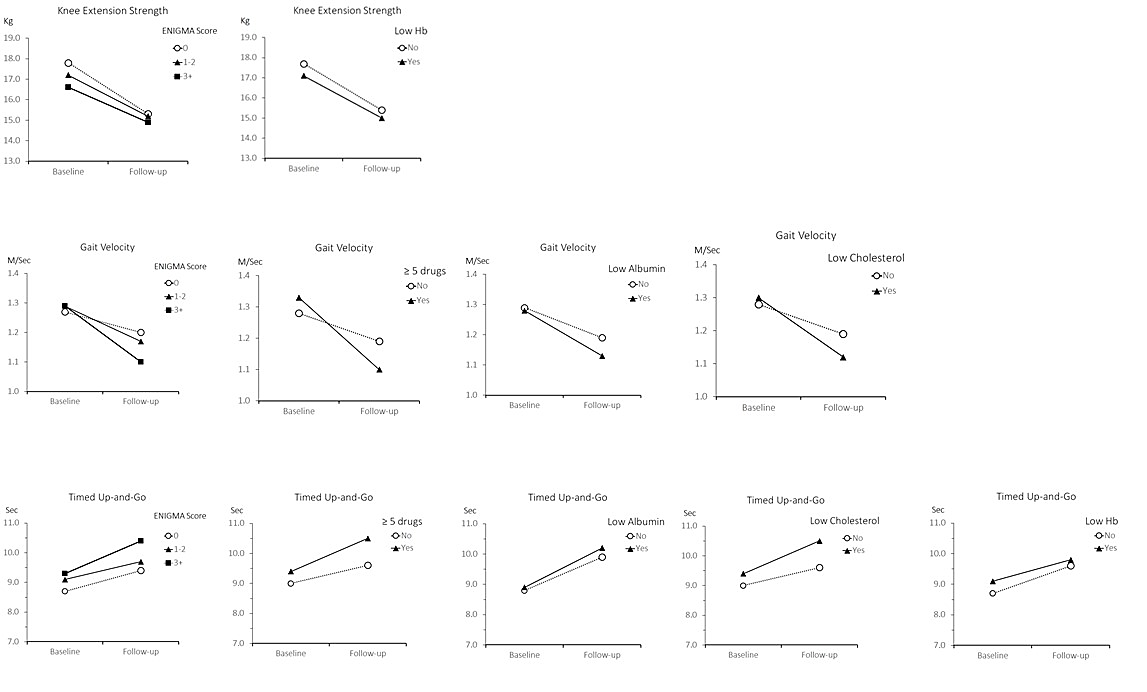


**Supplementary Figure 2**
